# Supplementary material
Source: PubMed Central journal article supplement (PMC1820720)

GAPDH

hnRNP C

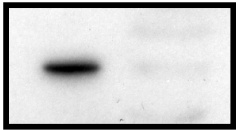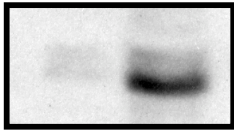

C N

C N

Supplement: pnas_0610167104_2.pdf [file pnas_0610167104_2.pdf]
